# Supplementary material
Source: publisher site journal article supplement (https://www.spandidos-publications.com/7590/downloadSupplementary)
Supplement: Supplementary file 1 [file downloadSupplementary]

Table SI. Ongoing clinical trials of ICI combination therapy in NSCLC.

| Clinical trial       | Setting                                                                                                                                                   | Intervention                                                                                   | Status                 |
|----------------------|-----------------------------------------------------------------------------------------------------------------------------------------------------------|------------------------------------------------------------------------------------------------|------------------------|
| NCT02194738          | Lung adenocarcinoma, lung large cell carcinoma, resectable lung non-small cell carcinoma, Stage IB-IIIa NSCLC, Stage IB-IIIa lung squamous cell carcinoma | Pembrolizumab + carboplatin/cisplatin/gemcitabine hydrochloride/paclitaxel                     | Active, not recruiting |
| NCT02314481          | NSCLC without an actionable mutation                                                                                                                      | Atezolizumab + cisplatin/carboplatin and pemetrexed, atezolizumab + carboplatin and paclitaxel | Active, not recruiting |
| NCT03944772          | EGFR-mutated NSCLC                                                                                                                                        | Durvalumab + carboplatin and pemetrexed                                                        | Active, not recruiting |
| NCT04379635          | NSCLC                                                                                                                                                     | Tislelizumab + cisplatin, paclitaxel, pemetrexed and carboplatin                               | Active, not recruiting |
| NCT02143466 (TATTON) | EGFR mutation positive advanced lung cancer                                                                                                               | Osimertinib plus durvalumab                                                                    | Active, not recruiting |
| NCT04449874          | NSCLC                                                                                                                                                     | Atezolizumab + GDC-6036                                                                        | Recruiting             |
| NCT03178552          | Advanced or metastatic NSCLC                                                                                                                              | Atezolizumab + vemurafenib (Cohort E)                                                          | Active, not recruiting |
| NCT04591431          | NSCLC                                                                                                                                                     | Erlotinib/alectinib/brigatinib/palbociclib/itacitinib + atezolizumab/nivolumab/ipilimumab      | Active, not recruiting |
| NCT04475939          | Metastatic and/or locally advanced NSCLC                                                                                                                  | Niraparib + pembrolizumab                                                                      | Active, not recruiting |
| NCT02432963          | Solid tumors that have failed prior therapy                                                                                                               | p53MVA (modified vaccinia virus Ankara vaccine expressing p53) + pembrolizumab                 | Active, not recruiting |
| NCT02824965          | NSCLC                                                                                                                                                     | CVA21 (oncolytic Coxsackie virus) + pembrolizumab                                              | Unknown status         |
| NCT03647163          | NSCLC and neuroendocrine carcinoma                                                                                                                        | VSV-IFN $\beta$ -NIS/VSV-IFN $\beta$ -NIS + pembrolizumab                                      | Recruiting             |

NCT, National Clinical Trial; VSV-IFN $\beta$ -NIS, vesicular stomatitis virus expressing both interferon  $\beta$  and sodium iodide symporter genes; NSCLC, non-small cell lung cancer; EGFR, epidermal growth factor receptor.
